# Supplementary material for: Retarded gravitational field of a Hubble sphere with radially varying density
Source: Research Square preprint supplement (doi:10.21203/rs.3.rs-8398846/v1), 2025-12-23
Supplement: Supplementary file 1 [file gravity_distance_table.pdf › gravity_distance_table.pdf]

| r (km)   | g_y(r) (m/s^2) |
|----------|----------------|----------|----------------|----------|----------------|----------|----------------|
| 0.0      | 0.0            | 1608.838 | 1.861          | 3217.677 | 5.64           | 4826.515 | 23.85          |
| 64.354   | 0.066          | 1673.192 | 1.955          | 3282.03  | 5.902          | 4890.869 | 25.901         |
| 128.707  | 0.132          | 1737.545 | 2.052          | 3346.384 | 6.178          | 4955.222 | 28.229         |
| 193.061  | 0.199          | 1801.899 | 2.151          | 3410.737 | 6.472          | 5019.576 | 30.887         |
| 257.414  | 0.265          | 1866.253 | 2.254          | 3475.091 | 6.783          | 5083.929 | 33.942         |
| 321.768  | 0.332          | 1930.606 | 2.36           | 3539.444 | 7.114          | 5148.283 | 37.477         |
| 386.121  | 0.399          | 1994.96  | 2.469          | 3603.798 | 7.466          | 5212.636 | 41.601         |
| 450.475  | 0.467          | 2059.313 | 2.582          | 3668.152 | 7.843          | 5276.99  | 46.455         |
| 514.828  | 0.535          | 2123.667 | 2.699          | 3732.505 | 8.245          | 5341.343 | 52.224         |
| 579.182  | 0.604          | 2188.02  | 2.82           | 3796.859 | 8.675          | 5405.697 | 59.156         |
| 643.535  | 0.673          | 2252.374 | 2.945          | 3861.212 | 9.137          | 5470.051 | 67.593         |
| 707.889  | 0.744          | 2316.727 | 3.075          | 3925.566 | 9.633          | 5534.404 | 78.008         |
| 772.242  | 0.815          | 2381.081 | 3.21           | 3989.919 | 10.168         | 5598.758 | 91.079         |
| 836.596  | 0.887          | 2445.434 | 3.351          | 4054.273 | 10.745         | 5663.111 | 107.805        |
| 900.949  | 0.96           | 2509.788 | 3.498          | 4118.626 | 11.37          | 5727.465 | 129.704        |
| 965.303  | 1.034          | 2574.141 | 3.65           | 4182.98  | 12.048         | 5791.818 | 159.175        |
| 1029.657 | 1.109          | 2638.495 | 3.81           | 4247.333 | 12.785         | 5856.172 | 200.199        |
| 1094.01  | 1.186          | 2702.848 | 3.976          | 4311.687 | 13.589         | 5920.525 | 259.774        |
| 1158.364 | 1.264          | 2767.202 | 4.151          | 4376.04  | 14.468         | 5984.879 | 351.156        |
| 1222.717 | 1.344          | 2831.556 | 4.333          | 4440.394 | 15.432         | 6049.232 | 502.024        |
| 1287.071 | 1.425          | 2895.909 | 4.524          | 4504.747 | 16.494         | 6113.586 | 778.478        |
| 1351.424 | 1.508          | 2960.263 | 4.725          | 4569.101 | 17.667         | 6177.939 | 1372.941       |
| 1415.778 | 1.593          | 3024.616 | 4.936          | 4633.455 | 18.967         | 6242.293 | 3063.155       |
| 1480.131 | 1.68           | 3088.97  | 5.159          | 4697.808 | 20.415         | 6306.646 | 12143.452      |
| 1544.485 | 1.77           | 3153.323 | 5.393          | 4762.162 | 22.033         | 6371.0   | inf            |
